# Supplementary material
Source: Springer Nature journal article supplement (https://www.springermedizin.de/resource/supplementary/12889_2010_2988_MOESM1_ESM.pdf/9487574)
Supplement: MOESM1 [file 9487574]

Telephone survey  
(*winter*)  
n=2223 (RR: 36.7%)

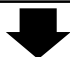

Agreed to follow-up  
n=1823

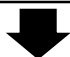

1st postal survey  
(*winter*)  
n=1049

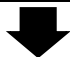

Agreed to follow-up  
n=798

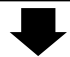

2nd postal survey  
(*summer*)  
n=492

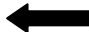

Excluded  
(missing data)  
n=64

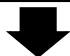

Analytical sample  
n=428
